# Supplementary material for: Multi-Elemental Analysis as a Tool to Ascertain the Safety and the Origin of Beehive Products: Development, Validation, and Application of an ICP-MS Method on Four Unifloral Honeys Produced in Sardinia, Italy
Source: MDPI journal article supplement (doi:10.3390/molecules27062009), 2022-03-21
Supplement: s1 [file s1]

## Supplementary material

**Figure S1.** Scree plot of the PCA performed of the training set (85 samples, 18 variables)

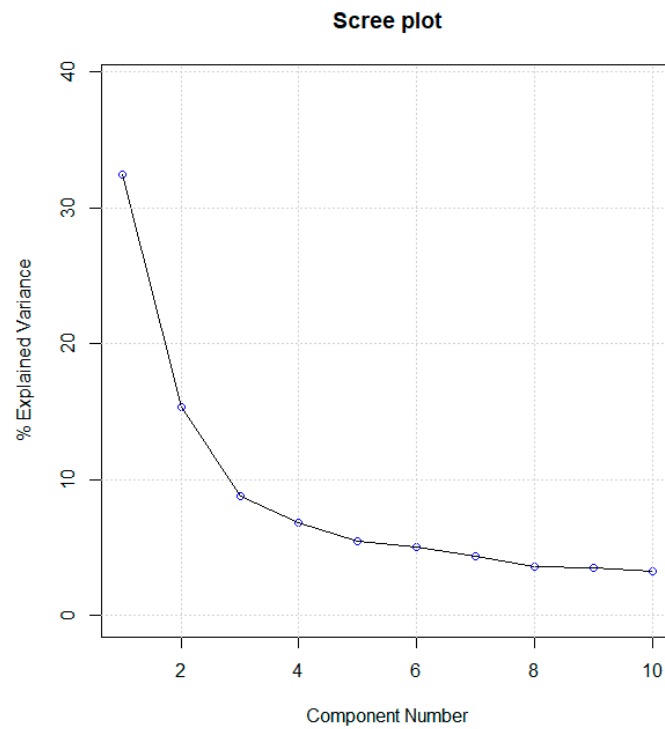

**Figure S2.** Influence plot of the PCA performed of the training set (85 samples, 18 variables)

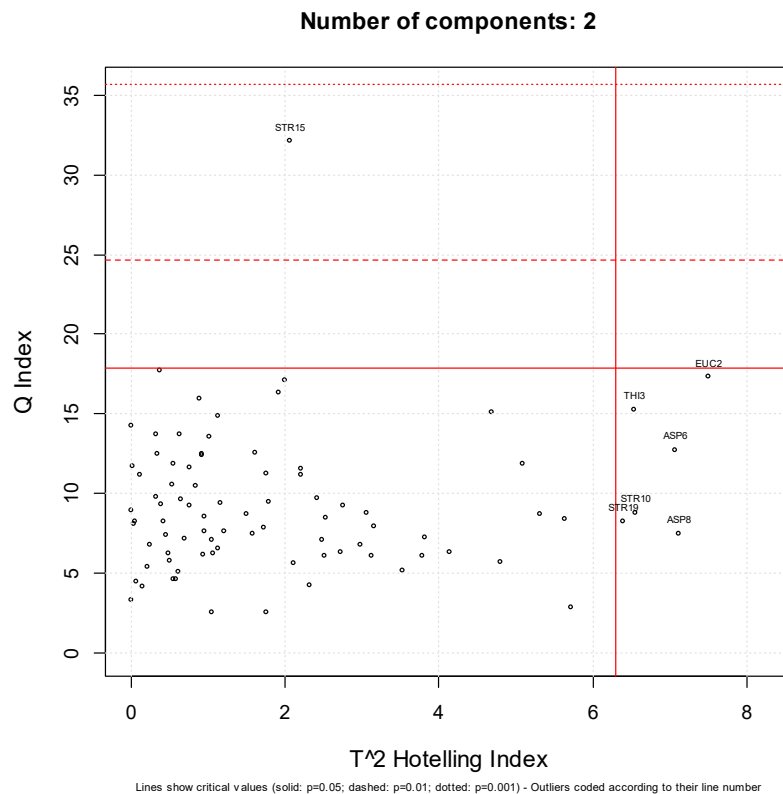

Figure S3. Permutation test of the LDA in calibration

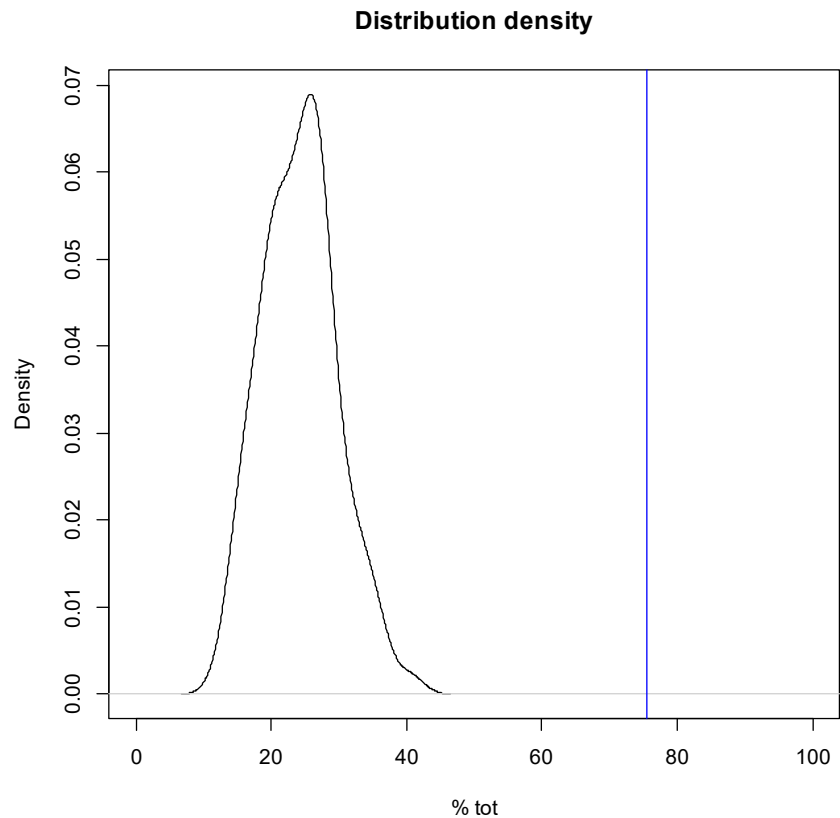

Table S2. Correlation's coefficients of the variables, before (blue) and after (red) the logarithmic transformation

|    | As   | Ba    | Bi    | Cd    | Co    | Cr    | Cu    | Fe   | Li    | Mn    | Mo   | Ni    | Pb    | Sn    | Sr    | Tl    | V     | Zn    |
|----|------|-------|-------|-------|-------|-------|-------|------|-------|-------|------|-------|-------|-------|-------|-------|-------|-------|
| As | 1.00 | 0.08  | -0.05 | 0.26  | 0.02  | -0.04 | 0.10  | 0.40 | -0.04 | 0.34  | 0.29 | -0.06 | -0.01 | 0.01  | 0.29  | 0.08  | 0.40  | 0.16  |
| Ba | 0.22 | 1.00  | -0.03 | -0.05 | -0.02 | -0.04 | -0.10 | 0.06 | -0.04 | 0.05  | 0.07 | -0.11 | -0.09 | 0.11  | 0.37  | 0.13  | 0.10  | -0.17 |
| Bi | 0.19 | 0.09  | 1.00  | -0.03 | 0.05  | -0.01 | 0.00  | 0.00 | 0.00  | -0.01 | 0.01 | -0.01 | -0.04 | -0.04 | 0.06  | -0.04 | -0.02 | -0.01 |
| Cd | 0.44 | -0.08 | 0.19  | 1.00  | 0.13  | -0.01 | 0.30  | 0.33 | -0.02 | 0.24  | 0.25 | 0.06  | 0.03  | -0.04 | 0.13  | 0.37  | 0.33  | 0.56  |
| Co | 0.36 | 0.09  | 0.33  | 0.63  | 1.00  | 0.22  | 0.35  | 0.27 | -0.03 | 0.27  | 0.19 | 0.19  | -0.03 | -0.08 | 0.18  | 0.25  | 0.34  | 0.30  |
| Cr | 0.02 | 0.03  | 0.19  | 0.18  | 0.24  | 1.00  | 0.00  | 0.17 | -0.01 | 0.13  | 0.18 | 0.16  | -0.02 | 0.04  | 0.12  | 0.02  | 0.17  | 0.04  |
| Cu | 0.23 | 0.01  | 0.21  | 0.52  | 0.68  | 0.01  | 1.00  | 0.37 | 0.05  | 0.21  | 0.23 | 0.75  | -0.05 | -0.05 | 0.04  | 0.25  | 0.22  | 0.62  |
| Fe | 0.49 | 0.32  | 0.43  | 0.48  | 0.62  | 0.24  | 0.60  | 1.00 | 0.07  | 0.72  | 0.51 | 0.15  | -0.08 | 0.01  | 0.56  | 0.34  | 0.88  | 0.28  |
| Li | 0.24 | 0.39  | 0.23  | 0.13  | 0.13  | 0.13  | 0.16  | 0.49 | 1.00  | -0.03 | 0.10 | -0.01 | -0.01 | -0.08 | 0.05  | 0.01  | 0.02  | -0.02 |
| Mn | 0.43 | 0.35  | 0.26  | 0.35  | 0.52  | 0.14  | 0.49  | 0.75 | 0.51  | 1.00  | 0.28 | 0.03  | -0.04 | -0.15 | 0.59  | 0.15  | 0.78  | 0.09  |
| Mo | 0.30 | 0.23  | 0.22  | 0.36  | 0.40  | 0.23  | 0.42  | 0.56 | 0.21  | 0.39  | 1.00 | 0.04  | -0.07 | 0.11  | 0.28  | 0.19  | 0.49  | 0.25  |
| Ni | 0.05 | -0.13 | 0.22  | 0.35  | 0.52  | 0.23  | 0.59  | 0.37 | 0.00  | 0.22  | 0.25 | 1.00  | 0.00  | -0.01 | -0.11 | 0.12  | 0.03  | 0.35  |
| Pb | 0.23 | 0.10  | -0.06 | 0.23  | 0.14  | 0.01  | 0.16  | 0.20 | 0.02  | 0.14  | 0.10 | 0.17  | 1.00  | 0.23  | -0.11 | 0.11  | -0.03 | 0.05  |
| Sn | 0.14 | 0.12  | -0.01 | -0.01 | 0.00  | -0.05 | 0.02  | 0.06 | -0.11 | -0.10 | 0.14 | 0.12  | 0.25  | 1.00  | 0.04  | 0.07  | -0.09 | 0.11  |
| Sr | 0.35 | 0.72  | 0.28  | 0.11  | 0.26  | 0.17  | 0.15  | 0.56 | 0.61  | 0.55  | 0.29 | -0.06 | 0.13  | -0.03 | 1.00  | 0.08  | 0.59  | -0.01 |
| Tl | 0.21 | -0.01 | 0.19  | 0.44  | 0.47  | 0.13  | 0.27  | 0.23 | 0.01  | 0.08  | 0.13 | 0.23  | 0.23  | 0.07  | 0.03  | 1.00  | 0.37  | 0.33  |
| V  | 0.47 | 0.29  | 0.31  | 0.47  | 0.60  | 0.30  | 0.47  | 0.84 | 0.48  | 0.76  | 0.56 | 0.19  | 0.21  | -0.03 | 0.54  | 0.20  | 1.00  | 0.18  |
| Zn | 0.24 | -0.17 | 0.25  | 0.60  | 0.62  | 0.16  | 0.61  | 0.45 | 0.12  | 0.32  | 0.34 | 0.46  | 0.09  | 0.07  | 0.06  | 0.41  | 0.41  | 1.00  |

**Table S3.** Instrumental parameters and elemental settings used for the ICP-MS determination of 23 trace elements in unifloral honeys.

| ICP-MS NexION 300X Perkin Elmer settings               |                                                                                                                                                                                                                                                                  |                                    |                                                          |                                                           |
|--------------------------------------------------------|------------------------------------------------------------------------------------------------------------------------------------------------------------------------------------------------------------------------------------------------------------------|------------------------------------|----------------------------------------------------------|-----------------------------------------------------------|
| RF power generator (W)                                 | 1300                                                                                                                                                                                                                                                             | KED mode cell entrance voltage (V) | -8.0                                                     |                                                           |
| Ar plasma flow (dm <sup>3</sup> min <sup>-1</sup> )    | 18.0                                                                                                                                                                                                                                                             | KED mode cell exit voltage (V)     | -25.0                                                    |                                                           |
| Ar auxiliary flow (dm <sup>3</sup> min <sup>-1</sup> ) | 1.20                                                                                                                                                                                                                                                             | Resolution (Da)                    | 0.7                                                      |                                                           |
| Ar nebulizer flow (dm <sup>3</sup> min <sup>-1</sup> ) | 0.91                                                                                                                                                                                                                                                             | Scan mode                          | Peak hopping                                             |                                                           |
| Nebulizer                                              | Meinhardt®, glass                                                                                                                                                                                                                                                | Detector mode                      | Dual                                                     |                                                           |
| Spray chamber                                          | Cyclonic, glass                                                                                                                                                                                                                                                  | Dwell time (ms)                    | 50                                                       |                                                           |
| Skimmer and sampling cones                             | Nickel                                                                                                                                                                                                                                                           | Number of points per peak          | 3                                                        |                                                           |
| Sampling depth (mm)                                    | 0                                                                                                                                                                                                                                                                | Acquisition time (s)               | 6                                                        |                                                           |
| Deflector voltage (V)                                  | -8.00                                                                                                                                                                                                                                                            | Acquisition dead time (ns)         | 35                                                       |                                                           |
| Analog stage voltage (V)                               | -1750                                                                                                                                                                                                                                                            | KED gas                            | Helium 99.999%                                           |                                                           |
| Pulse stage voltage (V)                                | +1350                                                                                                                                                                                                                                                            | Masses of optimization             | <sup>7</sup> Li, <sup>115</sup> In and <sup>205</sup> Tl |                                                           |
| Quantification ion<br>(% abundance)                    | Interfering ions                                                                                                                                                                                                                                                 | Analysing<br>mode                  | He flow rate<br>(cm <sup>3</sup> min <sup>-1</sup> )     | Correction equation                                       |
| <sup>107</sup> Ag <sup>+</sup> (51.84)                 | <sup>91</sup> Y <sup>16</sup> O <sup>+</sup> , <sup>91</sup> Zr <sup>16</sup> O <sup>+</sup>                                                                                                                                                                     | Normal                             | -                                                        |                                                           |
| <sup>75</sup> As <sup>+</sup> (100)                    | <sup>40</sup> Ar <sup>35</sup> Cl <sup>+</sup> , <sup>59</sup> Co <sup>16</sup> O <sup>+</sup> , <sup>39</sup> K <sup>36</sup> Ar <sup>+</sup> , <sup>63</sup> Cu <sup>12</sup> C <sup>+</sup> , <sup>40</sup> Ca <sup>35</sup> Cl <sup>+</sup>                  | KED                                | 3.0                                                      |                                                           |
| <sup>138</sup> Ba <sup>+</sup> (71.7)                  | <sup>40</sup> Ar <sup>258</sup> Ni <sup>+</sup> , <sup>138</sup> La <sup>+</sup> , <sup>122</sup> Sn <sup>16</sup> O <sup>+</sup> , <sup>121</sup> Sb <sup>16</sup> O <sup>1</sup> H <sup>+</sup>                                                                | KED                                | 4.0                                                      | -0.000901x <sup>139</sup> La -0.002838x <sup>140</sup> Ce |
| <sup>9</sup> Be <sup>+</sup> (100)                     | none                                                                                                                                                                                                                                                             | Normal                             | -                                                        |                                                           |
| <sup>209</sup> Bi <sup>+</sup> (100)                   | none                                                                                                                                                                                                                                                             | Normal                             | -                                                        |                                                           |
| <sup>111</sup> Cd <sup>+</sup> (12.80)                 | <sup>95</sup> Mo <sup>16</sup> O <sup>+</sup> , <sup>97</sup> Mo <sup>14</sup> N <sup>+</sup> , <sup>79</sup> Br <sup>16</sup> O <sup>2</sup> +, <sup>94</sup> Zr <sup>16</sup> O <sup>1</sup> H <sup>+</sup> , <sup>71</sup> Ga <sup>40</sup> Ar <sup>+</sup>   | KED                                | 4.0                                                      |                                                           |
| <sup>59</sup> Co <sup>+</sup> (100)                    | <sup>24</sup> Mg <sup>35</sup> Cl <sup>+</sup> , <sup>40</sup> Ar <sup>18</sup> O <sup>1</sup> H <sup>+</sup> , <sup>27</sup> Al <sup>16</sup> O <sup>2</sup> +, <sup>24</sup> Mg <sup>35</sup> Cl <sup>+</sup>                                                  | KED                                | 3.5                                                      |                                                           |
| <sup>52</sup> Cr <sup>+</sup> (83.79)                  | <sup>40</sup> Ar <sup>12</sup> C <sup>+</sup> , <sup>36</sup> Ar <sup>16</sup> O <sup>+</sup> , <sup>1</sup> H <sup>35</sup> Cl <sup>16</sup> O <sup>+</sup> , <sup>40</sup> Ca <sup>12</sup> C <sup>+</sup> , <sup>38</sup> Ar <sup>14</sup> N <sup>+</sup>     | KED                                | 3.0                                                      |                                                           |
| <sup>63</sup> Cu <sup>+</sup> (69.17)                  | <sup>40</sup> Ar <sup>23</sup> Na <sup>+</sup> , <sup>31</sup> P <sup>16</sup> O <sup>2</sup> +, <sup>47</sup> Ti <sup>16</sup> O <sup>+</sup> , <sup>28</sup> Si <sup>35</sup> Cl <sup>+</sup> , <sup>51</sup> V <sup>12</sup> C <sup>+</sup>                   | KED                                | 4.0                                                      |                                                           |
| <sup>57</sup> Fe <sup>+</sup> (2.12)                   | <sup>40</sup> Ar <sup>16</sup> O <sup>1</sup> H <sup>+</sup> , <sup>40</sup> Ca <sup>16</sup> O <sup>1</sup> H <sup>+</sup> , <sup>40</sup> K <sup>16</sup> O <sup>1</sup> H <sup>+</sup>                                                                        | KED                                | 3.0                                                      |                                                           |
| <sup>7</sup> Li <sup>+</sup> (92.50)                   | none                                                                                                                                                                                                                                                             | Normal                             | -                                                        |                                                           |
| <sup>202</sup> Hg <sup>+</sup> (22.86)                 | <sup>186</sup> W <sup>16</sup> O <sup>+</sup>                                                                                                                                                                                                                    | Normal                             | -                                                        |                                                           |
| <sup>55</sup> Mn <sup>+</sup> (100)                    | <sup>40</sup> Ar <sup>14</sup> N <sup>1</sup> H <sup>+</sup> , <sup>37</sup> Cl <sup>18</sup> O <sup>+</sup> , <sup>39</sup> K <sup>16</sup> O <sup>+</sup>                                                                                                      | KED                                | 3.0                                                      |                                                           |
| <sup>98</sup> Mo <sup>+</sup> (24.13)                  | <sup>98</sup> Ru <sup>+</sup> , <sup>81</sup> Br <sup>17</sup> O <sup>+</sup> , <sup>40</sup> K <sup>218</sup> O <sup>+</sup> , <sup>58</sup> Ni <sup>40</sup> Ar <sup>+</sup> , <sup>63</sup> Cu <sup>35</sup> Cl <sup>+</sup>                                  | Normal                             | -                                                        | -0.10961 x <sup>101</sup> Ru                              |
| <sup>60</sup> Ni <sup>+</sup> (26.22)                  | <sup>44</sup> Ca <sup>16</sup> O <sup>+</sup> , <sup>43</sup> Ca <sup>16</sup> O <sup>1</sup> H <sup>+</sup> , <sup>23</sup> Na <sup>37</sup> Cl <sup>+</sup> , <sup>25</sup> Mg <sup>35</sup> Cl <sup>+</sup> , <sup>28</sup> Si <sup>16</sup> O <sup>2</sup> + | KED                                | 3.5                                                      |                                                           |
| <sup>208</sup> Pb <sup>+</sup> (52.40)                 | none                                                                                                                                                                                                                                                             | Normal                             | -                                                        |                                                           |
| <sup>121</sup> Sb <sup>+</sup> (57.21)                 | <sup>107</sup> Ag <sup>14</sup> N <sup>+</sup> , <sup>109</sup> Ag <sup>12</sup> C <sup>+</sup> , <sup>105</sup> Pd <sup>16</sup> O <sup>+</sup> , <sup>81</sup> Br <sup>40</sup> Ar <sup>+</sup> , <sup>120</sup> Sn <sup>1</sup> H <sup>+</sup>                | KED                                | 3.5                                                      |                                                           |
| <sup>120</sup> Sn <sup>+</sup> (32.58)                 | <sup>39</sup> K <sup>81</sup> Br <sup>+</sup> , <sup>80</sup> Se <sup>40</sup> Ar <sup>+</sup> , <sup>104</sup> Pd <sup>16</sup> O <sup>+</sup> , <sup>104</sup> Ru <sup>16</sup> O <sup>+</sup>                                                                 | KED                                | 3.5                                                      |                                                           |
| <sup>88</sup> Sr <sup>+</sup> (82.58)                  | <sup>56</sup> FeO <sup>2</sup> +, <sup>87</sup> Rb <sup>1</sup> H <sup>+</sup> , <sup>48</sup> Ti <sup>40</sup> Ar <sup>+</sup>                                                                                                                                  | KED                                | 3                                                        |                                                           |
| <sup>130</sup> Te <sup>+</sup> (34.08)                 | <sup>95</sup> MoO <sup>2</sup> +, <sup>114</sup> Cd <sup>16</sup> O <sup>+</sup> , <sup>90</sup> Zr <sup>40</sup> Ar <sup>+</sup>                                                                                                                                | KED                                | 4                                                        | -0.0094 x <sup>137</sup> Ba – 0.1543 x <sup>129</sup> Xe  |
| <sup>205</sup> Tl <sup>+</sup> (70.26)                 | <sup>189</sup> Os <sup>16</sup> O <sup>+</sup>                                                                                                                                                                                                                   | Normal                             | -                                                        |                                                           |
| <sup>51</sup> V <sup>+</sup> (99.75)                   | <sup>35</sup> Cl <sup>16</sup> O <sup>+</sup>                                                                                                                                                                                                                    | KED                                | 3.0                                                      |                                                           |
| <sup>66</sup> Zn <sup>+</sup> (27.90)                  | <sup>50</sup> Ti <sup>16</sup> O <sup>+</sup> , <sup>65</sup> Cu <sup>1</sup> H <sup>+</sup> , <sup>26</sup> Mg <sup>40</sup> Ar <sup>+</sup> , <sup>31</sup> P <sup>35</sup> Cl <sup>+</sup> , <sup>52</sup> Cr <sup>14</sup> N <sup>+</sup>                    | KED                                | 3.0                                                      |                                                           |
